# Supplementary material for: Consistent inclusion of continuum solvation in energy decomposition analysis: theory and application to molecular CO 2 reduction catalysts
Source: Royal Society of Chemistry journal article supplement (doi:10.1039/d0sc05327a), 2020-11-27
Supplement: d0sc05327a1.pdf [file d0sc05327a1.pdf]

# Electronic Supplementary Information for “Consistent Inclusion of Continuum Solvation in Energy Decomposition Analysis: Theory and Application to Molecular CO<sub>2</sub> Reduction Catalysts”

Yuezhi Mao,<sup>\*a‡§</sup> Matthias Loipersberger,<sup>a‡</sup> Kareesa J. Kron,<sup>b</sup> Jeffrey S. Derrick,<sup>a</sup>  
Christopher J. Chang,<sup>acd</sup>, Shaama Mallikarjun Sharada,<sup>be</sup> and Martin Head-Gordon<sup>\*ac</sup>

November 26, 2020

## CONTENTS

|                                                                                       |           |
|---------------------------------------------------------------------------------------|-----------|
| <b>S1 Additional results for the validation of ALMO-EDA(solv)</b>                     | <b>2</b>  |
| <b>S2 Additional results for the [FeTPP(CO<sub>2</sub><sup>•-</sup>)] derivatives</b> | <b>4</b>  |
| <b>S3 Additional results for the substituted terphenyl...CO<sub>2</sub> complexes</b> | <b>6</b>  |
| <b>S4 Sample input for calculations using PCM</b>                                     | <b>11</b> |

---

<sup>a</sup> Department of Chemistry, University of California at Berkeley, Berkeley, CA 94720, USA; E-mail: yuezhi.mao@berkeley.edu, mhg@cchem.berkeley.edu

<sup>b</sup> Mork Family Department of Chemical Engineering and Material Science, University of Southern California, Los Angeles, CA 90089, USA

<sup>c</sup> Chemical Sciences Division, Lawrence Berkeley National Laboratory, Berkeley, CA 94720, USA

<sup>d</sup> Department of Molecular and Cell Biology, University of California Berkeley, Berkeley, CA 94720, USA

<sup>e</sup> Department of Chemistry, University of Southern California, Los Angeles, CA 90089, USA

<sup>‡</sup> These two authors contributed equally

<sup>§</sup> Present Address: Department of Chemistry, Stanford University, Stanford, CA 94305, USA

## S1 Additional results for the validation of ALMO-EDA(solv)

Table S1: Strength (in kJ/mol) of internal QM electrostatics ( $\Delta E_{\text{ELEC}}^{(0)}$ ) and the effect of solute-solvent electrostatic interaction on binding ( $\Delta E_{\text{SOL}}^{\text{el}}$ ) for  $\text{Na}^+ \cdots \text{Cl}^-$  separated by 20 Å calculated with  $\omega\text{B97X-V/def2-TZVPPD}$  and IEF-PCM with varying dielectric constants.  $\Delta E_{\text{ELEC}}^{(s)} = \Delta E_{\text{ELEC}}^{(0)} + \Delta E_{\text{SOL}}^{\text{el}}$  is the effective (screened) electrostatic interaction in the solution phase.

| $\epsilon$ | $\Delta E_{\text{ELEC}}^{(0)}$ | $\Delta E_{\text{SOL}}^{\text{el}}$ | $\Delta E_{\text{ELEC}}^{(s)}$ | $\Delta E_{\text{ELEC}}^{(0)} / \Delta E_{\text{ELEC}}^{(s)}$ |
|------------|--------------------------------|-------------------------------------|--------------------------------|---------------------------------------------------------------|
| 1          | -69.47                         | 0                                   | -69.47                         | 1.0                                                           |
| 10         | -69.47                         | 62.52                               | -6.94                          | 10.0                                                          |
| 20         | -69.47                         | 65.99                               | -3.47                          | 20.0                                                          |
| 40         | -69.47                         | 67.73                               | -1.74                          | 40.0                                                          |
| 80         | -69.47                         | 68.60                               | -0.87                          | 79.9                                                          |

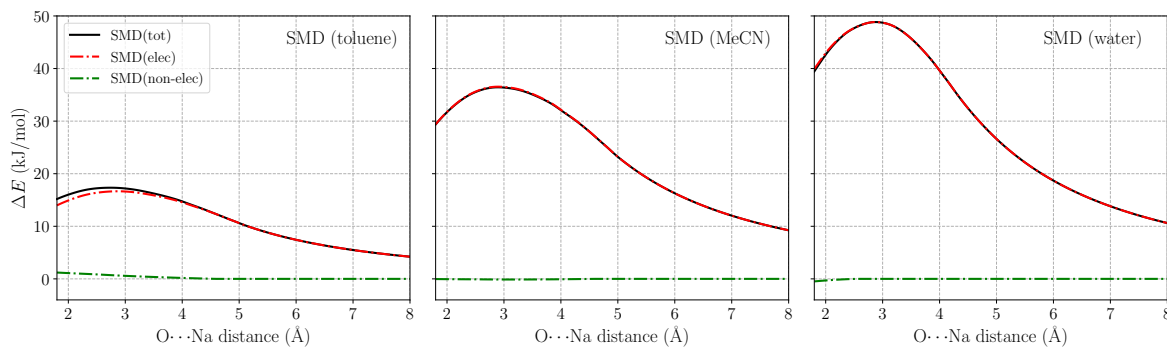

Figure S1: Electrostatic and non-electrostatic components (in kJ/mol) of the solvent contribution ( $\Delta E_{\text{SOL}}$ ) to the  $\text{H}_2\text{O} \cdots \text{Na}^+$  interaction with the  $\text{O} \cdots \text{Na}^+$  distance ranging from 1.8 to 8.0 Å, with solvents toluene, MeCN, and water modeled by SMD.

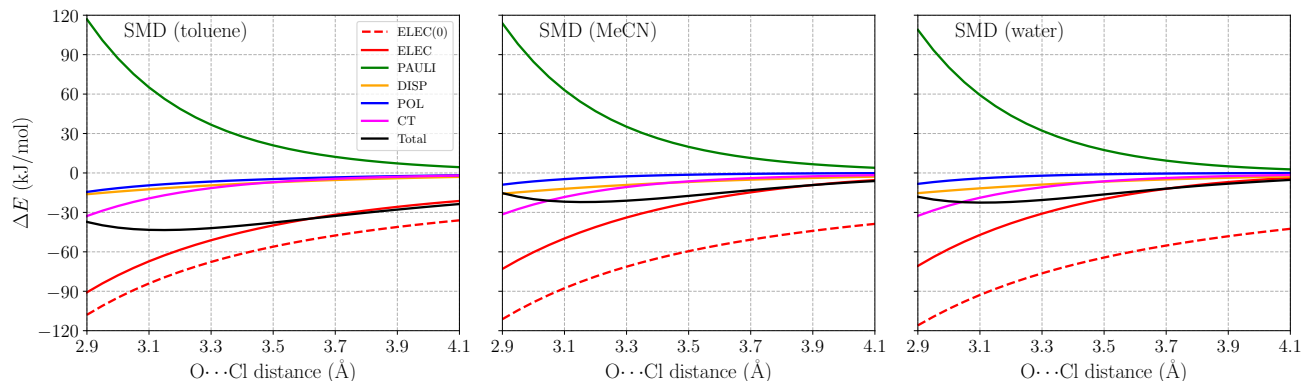

Figure S2: ALMO-EDA(sol) results (in kJ/mol) for the  $\text{H}_2\text{O} \cdots \text{Cl}^-$  complex in toluene, acetonitrile (MeCN), and water solutions with the  $\text{O} \cdots \text{Cl}^-$  distance ranging from 2.9 to 4.1 Å. All calculations are performed using  $\omega\text{B97X-V}/\text{def2-TZVPPD}$  with solvents described by the SMD model. Terms in ALMO-EDA(sol) are represented with solid lines while the internal electrostatic interaction, denoted as “ELEC(0)”, is shown in a dashed line.

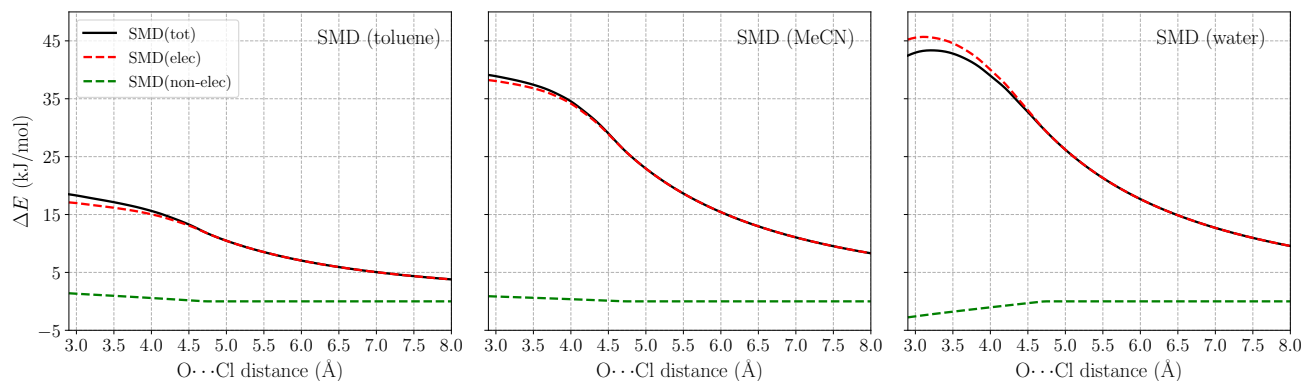

Figure S3: Electrostatic and non-electrostatic components (in kJ/mol) of the solvent contribution ( $\Delta E_{\text{SOL}}$ ) to the  $\text{H}_2\text{O} \cdots \text{Cl}^-$  interaction with the  $\text{O} \cdots \text{Cl}^-$  distance ranging from 2.9 to 8.0 Å, with solvents toluene, MeCN, and water modeled by SMD.

## S2 Additional results for the $[\text{FeTPP}(\text{CO}_2^{\bullet-})]$ derivatives

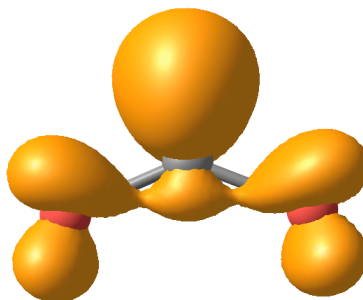

Figure S4: Spin density of  $\text{CO}_2^{\bullet-}$  (isovalue: 0.08 a.u.) optimized with  $\omega\text{B97X-V/def2-TZVPP}$ .

Table S2: Geometry distortion (GD) term for the  $\text{CO}_2$  fragment with different fragmentation schemes (in kJ/mol).

| Fragment                 | $\Delta E_{\text{GD}}$ |
|--------------------------|------------------------|
| $\text{CO}_2$            | 206.6                  |
| $\text{CO}_2^{\bullet-}$ | 0.6                    |

Table S3:  $\text{Fe}-\text{CO}_2$  bond length (in Å) for all  $\text{CO}_2$  adducts investigated in this study. All geometries are optimized with  $\omega\text{B97X-V/def2-TZVPP}$  with PCM model for the  $\text{CH}_3\text{CN}$  solvent ( $\epsilon = 35.88$ ).

| Complex                                       | $r(\text{Fe}-\text{C})$ |
|-----------------------------------------------|-------------------------|
| $[\text{FeTPP}(\text{CO}_2)]^{2-}$            | 2.08                    |
| $[\text{Fe-}p\text{-SUL}-(\text{CO}_2)]^{4-}$ | 2.09                    |
| $[\text{Fe-}p\text{-TMA}-(\text{CO}_2)]^0$    | 2.10                    |
| $[\text{Fe-}o\text{-TMA}-(\text{CO}_2)]^0$    | 2.06                    |
| $[\text{Fe-}o\text{-OH}-(\text{CO}_2)]^{2-}$  | 2.01                    |
| $[\text{FeTPPF10}(\text{CO}_2)]^{2-}$         | 2.10                    |
| $[\text{Fe-imid}-(\text{CO}_2)]^-$            | 2.07                    |
| $[\text{Fe-imid2}-(\text{CO}_2)]^0$           | 2.00                    |

Table S4: ALMO-EDA(solv) results (in kJ/mol) with  $\omega$ B97X-V/def2-TZVPP and PCM solvent ( $\text{CH}_3\text{CN}$ ,  $\epsilon = 35.88$ ) for all the different derivatives of the doubly reduced FeTPP– $\text{CO}_2$  adducts studied in this work.

| Complex                                                         | ELEC    | PAULI | DISP   | POL    | CT     | INT    |
|-----------------------------------------------------------------|---------|-------|--------|--------|--------|--------|
| $[\text{FeTPP}(\text{CO}_2)]^{2-}$                              | -363.4  | 634.2 | -66.2  | -135.4 | -123.0 | -53.8  |
| $[\text{FeTPPF10}(\text{CO}_2)]^{2-}$                           | -343.1  | 594.9 | -66.0  | -127.1 | -106.0 | -47.3  |
| $[\text{Fe-}o\text{-OH}(\text{CO}_2)]^{2-}$                     | -542.4  | 848.7 | -88.5  | -168.3 | -167.5 | -117.9 |
| $[\text{Fe-}p\text{-OH}(\text{CO}_2)]^{2-}$                     | -357.3  | 626.9 | -66.1  | -134.2 | -111.7 | -42.5  |
| $[\text{Fe-}p\text{-TMA}(\text{CO}_2)]^0$                       | -296.2  | 451.2 | -71.7  | -47.3  | -111.0 | -75.0  |
| $[\text{Fe-}o\text{-TMA}(\text{CO}_2)]^0$                       | -379.3  | 545.7 | -96.2  | -59.5  | -129.7 | -119.0 |
| $[\text{Fe-}p\text{-SUL}(\text{CO}_2)]^{4-}$                    | -343.1  | 613.9 | -66.1  | -132.6 | -119.7 | -47.6  |
| $[\text{Fe-}o\text{-imid}(\text{CO}_2)]^-$                      | -449.3  | 748.0 | -100.0 | -153.0 | -149.2 | -103.1 |
| $[\text{Fe-}o\text{-imid2}(\text{CO}_2)]^0$                     | -1005.4 | 955.3 | -131.2 | -201.4 | -176.1 | -197.3 |
| $[\text{Fe-}o\text{-imid2}(\text{CO}_2)]^{2-}(\text{NH-ref})^a$ | -504.0  | 827.1 | -91.3  | -163.7 | -155.5 | -87.4  |

<sup>a</sup> The  $[\text{Fe-}o\text{-imid2}(\text{CO}_2)]^{2-}(\text{NH-ref})$  corresponds the reference calculation to separate the effect of the amino hydrogen bonds and the methylimidazolium. We replaced the methylimidazolium with methyl and kept the bond distances for both hydrogen bonds frozen.

Table S5: Gas phase ALMO-EDA results with  $\omega$ B97X-V/def2-TZVPP (in kJ/mol) for the selected derivatives of the doubly reduced FeTPP– $\text{CO}_2$  complexes.

| Complex                                      | ELEC   | PAULI | DISP  | POL    | CT     | INT    |
|----------------------------------------------|--------|-------|-------|--------|--------|--------|
| $[\text{FeTPP}(\text{CO}_2)]^{2-}$           | -135.5 | 600.6 | -64.8 | -182.2 | -126.7 | 128.5  |
| $[\text{Fe-}p\text{-SUL}(\text{CO}_2)]^{4-}$ | 150.4  | 625.2 | -65.8 | -179.9 | -121.8 | 408.1  |
| $[\text{Fe-}o\text{-TMA}(\text{CO}_2)]^0$    | -401.0 | 444.6 | -72.0 | -95.1  | -110.3 | -233.8 |

### S3 Additional results for the substituted terphenyl $\cdots$ CO<sub>2</sub> complexes

Below we show the ALMO-EDA results for the reactant and product states of the substituted terphenyl $\cdots$ CO<sub>2</sub> complex (carrying  $-1$  charge) evaluated at the  $\omega$ B97X-V/def2-TZVPD (Tables S6) and S7) and B3LYP-D3(BJ)/6-311G(d,p) levels of theory with or without solvent. Comparing the results in Table S7 and Table S9, we found that B3LYP-D3(BJ)/6-311G(d,p) produces much larger CT energies than  $\omega$ B97X-V/def2-TZVPD for the product-state complexes when the solvent is absent. The differences in reactant state, on the other hand, are much more moderate. We ascribe this discrepancy to the more substantial delocalization error associated with the B3LYP functional,<sup>1,2</sup> which, as shown in our previous work,<sup>3</sup> can result in substantial overestimation of the CT component in ALMO-EDA (and correspondingly the total binding energy). Using the range-separated hybrid  $\omega$ B97X-V functional, on the other hand, considerably reduces the spurious charge delocalization, and results in unconstrained SCF solutions for the reactant and product states in which the excess electron is well-localized on the terphenyl and CO<sub>2</sub> moieties, respectively. Table S10 shows the fragment Mulliken populations in the *fully relaxed* reactant and product states given by these two levels of theory. It reveals that the charge population on the CO<sub>2</sub> moiety largely deviates from  $-1$  when calculated with B3LYP-D3(BJ) in vacuum, which, however, does not occur when  $\omega$ B97X-V is employed. Interestingly, with the presence of SMD solvent, the ALMO-EDA results at these two different levels of theory become more comparable (see Tables S6 and S8), indicating that the solvent environment assists in stabilizing the charge-separated reactant and product states and mitigates the spurious charge delocalization associated with the B3LYP-D3(BJ)/6-311G(d,p) model chemistry. This further demonstrates the value of incorporating solvation effects in ALMO-EDA calculations for intermolecular complexes in solution, since otherwise the EDA results will suffer from artifacts caused by the unrealistic gas phase environment. The differences between the CT energies given by these two levels of theory now mainly arise from the larger basis set superposition error (BSSE) associated with the smaller 6-311G(d,p) basis set.

Table S6: ALMO-EDA(solv) results with  $\omega$ B97X-V/def2-TZVPD (in kJ/mol) for the reactant- and product-state complexes of the electron-transfer reaction from terphenyl $^{\bullet-}$  to CO<sub>2</sub> in CH<sub>2</sub>Cl<sub>2</sub> ( $\epsilon = 8.93$ , described by the SMD model).

|                   | Reactant state |       |        |       |       |        |
|-------------------|----------------|-------|--------|-------|-------|--------|
|                   | ELEC           | PAULI | DISP   | POL   | CT    | INT    |
| -NMe <sub>2</sub> | -14.32         | 24.63 | -21.27 | -1.26 | -2.81 | -15.02 |
| -OH               | -12.61         | 21.31 | -18.85 | -1.06 | -2.52 | -13.73 |
| -CH <sub>3</sub>  | -13.52         | 22.01 | -17.99 | -1.07 | -2.58 | -13.15 |
| -H                | -12.75         | 22.06 | -19.29 | -1.10 | -2.62 | -13.70 |
| -Br               | -11.92         | 22.27 | -19.5  | -1.10 | -2.60 | -12.86 |
| -CF <sub>3</sub>  | -11.79         | 21.90 | -19.56 | -1.09 | -2.50 | -13.04 |
| -NO <sub>2</sub>  | -10.81         | 21.12 | -19.09 | -1.03 | -2.21 | -12.02 |
|                   | Product state  |       |        |       |       |        |
|                   | ELEC           | PAULI | DISP   | POL   | CT    | INT    |
| -NMe <sub>2</sub> | 8.97           | 12.44 | -16.80 | -1.55 | -1.10 | 1.96   |
| -OH               | 5.79           | 13.28 | -16.96 | -1.56 | -1.14 | -0.58  |
| -CH <sub>3</sub>  | 5.97           | 13.44 | -17.12 | -1.60 | -1.16 | -0.46  |
| -H                | 4.78           | 13.52 | -17.04 | -1.56 | -1.15 | -1.44  |
| -Br               | 0.65           | 13.78 | -17.07 | -1.61 | -1.17 | -5.42  |
| -CF <sub>3</sub>  | -1.26          | 14.02 | -17.15 | -1.60 | -1.16 | -7.15  |
| -NO <sub>2</sub>  | -4.97          | 14.42 | -17.19 | -1.67 | -1.20 | -10.61 |

Table S7: ALMO-EDA results (in kJ/mol) with  $\omega$ B97X-V/def2-TZVPD for the reactant- and product-state complexes of the electron-transfer reaction from terphenyl<sup>•-</sup> to CO<sub>2</sub> in the gas phase.

|                   | Reactant state |       |        |        |       |        |
|-------------------|----------------|-------|--------|--------|-------|--------|
|                   | ELEC           | PAULI | DISP   | POL    | CT    | INT    |
| -NMe <sub>2</sub> | -19.05         | 26.29 | -21.29 | -3.58  | -3.16 | -20.80 |
| -OH               | -17.53         | 22.69 | -18.81 | -3.17  | -2.81 | -19.64 |
| -CH <sub>3</sub>  | -17.71         | 23.75 | -18.05 | -3.31  | -2.99 | -18.31 |
| -H                | -17.35         | 23.41 | -19.28 | -3.35  | -2.93 | -19.50 |
| -Br               | -15.84         | 23.61 | -19.52 | -2.80  | -2.85 | -17.39 |
| -CF <sub>3</sub>  | -15.32         | 22.92 | -19.59 | -2.69  | -2.70 | -17.38 |
| -NO <sub>2</sub>  | -15.25         | 22.90 | -19.39 | -2.86  | -2.57 | -17.17 |
|                   | Product state  |       |        |        |       |        |
|                   | ELEC           | PAULI | DISP   | POL    | CT    | INT    |
| -NMe <sub>2</sub> | 35.10          | 15.16 | -17.09 | -24.87 | -1.43 | 6.88   |
| -OH               | 19.27          | 16.00 | -17.25 | -23.20 | -1.53 | -6.72  |
| -CH <sub>3</sub>  | 20.32          | 16.16 | -17.43 | -23.78 | -1.56 | -6.29  |
| -H                | 15.58          | 16.26 | -17.36 | -22.84 | -1.55 | -9.92  |
| -Br               | -2.11          | 16.53 | -17.42 | -24.83 | -1.63 | -29.46 |
| -CF <sub>3</sub>  | -12.37         | 16.80 | -17.50 | -24.06 | -1.64 | -38.77 |
| -NO <sub>2</sub>  | -27.95         | 17.22 | -17.57 | -25.04 | -1.73 | -55.07 |

Table S8: ALMO-EDA(solv) results with **B3LYP-D3(BJ)/6-311G(d,p)** (in kJ/mol) for the reactant- and product-state complexes of the electron-transfer reaction from terphenyl<sup>•-</sup> to CO<sub>2</sub> in CH<sub>2</sub>Cl<sub>2</sub> ( $\epsilon = 8.93$ , described by the SMD model). Note that counterpoise correction is *not* applied in these calculations since it is currently incompatible with the SMD model.

|                   | Reactant state |       |        |       |        |        |
|-------------------|----------------|-------|--------|-------|--------|--------|
|                   | ELEC           | PAULI | DISP   | POL   | CT     | INT    |
| -NMe <sub>2</sub> | -9.44          | 17.40 | -19.38 | -0.41 | -8.54  | -20.37 |
| -OH               | -8.47          | 15.08 | -17.22 | -0.34 | -7.34  | -18.29 |
| -CH <sub>3</sub>  | -9.04          | 15.57 | -16.60 | -0.35 | -7.43  | -17.85 |
| -H                | -8.32          | 15.49 | -17.45 | -0.36 | -7.53  | -18.16 |
| -Br               | -7.67          | 15.98 | -18.11 | -0.37 | -7.44  | -17.61 |
| -CF <sub>3</sub>  | -7.77          | 15.74 | -17.95 | -0.31 | -7.36  | -17.65 |
| -NO <sub>2</sub>  | -7.05          | 15.40 | -18.02 | -0.27 | -7.16  | -17.10 |
|                   | Product state  |       |        |       |        |        |
|                   | ELEC           | PAULI | DISP   | POL   | CT     | INT    |
| -NMe <sub>2</sub> | 13.42          | 3.76  | -9.72  | -1.29 | -11.04 | -4.87  |
| -OH               | 10.61          | 4.07  | -9.90  | -1.26 | -11.69 | -8.18  |
| -CH <sub>3</sub>  | 10.35          | 4.14  | -9.99  | -1.30 | -11.95 | -8.75  |
| -H                | 9.30           | 4.16  | -9.98  | -1.26 | -12.08 | -9.85  |
| -Br               | 5.62           | 4.19  | -10.10 | -1.31 | -12.20 | -13.81 |
| -CF <sub>3</sub>  | 3.86           | 4.19  | -10.17 | -1.30 | -12.33 | -15.75 |
| -NO <sub>2</sub>  | 0.24           | 4.32  | -10.30 | -1.38 | -19.09 | -26.21 |



Table S9: ALMO-EDA results (in kJ/mol) with **B3LYP-D3(BJ)/6-311G(d,p)** (counterpoise-corrected) for the reactant- and product-state complexes of the electron-transfer reaction from terphenyl<sup>•-</sup> to CO<sub>2</sub> **in the gas phase**.

|                   | Reactant state |       |        |        |        |         |
|-------------------|----------------|-------|--------|--------|--------|---------|
|                   | ELEC           | PAULI | DISP   | POL    | CT     | INT     |
| -NMe <sub>2</sub> | -14.43         | 18.81 | -19.40 | -2.10  | -2.87  | -19.99  |
| -OH               | -13.88         | 16.31 | -17.23 | -1.96  | -2.22  | -18.99  |
| -CH <sub>3</sub>  | -13.33         | 16.94 | -16.63 | -2.04  | -2.83  | -17.89  |
| -H                | -13.34         | 16.71 | -17.48 | -2.08  | -2.42  | -18.61  |
| -Br               | -11.92         | 17.19 | -18.14 | -1.68  | -2.43  | -16.98  |
| -CF <sub>3</sub>  | -11.64         | 16.65 | -17.98 | -1.56  | -2.29  | -16.82  |
| -NO <sub>2</sub>  | -10.19         | 16.30 | -18.05 | -1.22  | -2.01  | -15.16  |
|                   | Product state  |       |        |        |        |         |
|                   | ELEC           | PAULI | DISP   | POL    | CT     | INT     |
| -NMe <sub>2</sub> | 45.95          | 2.49  | -9.72  | -22.72 | -8.98  | 7.02    |
| -OH               | 30.65          | 2.68  | -9.90  | -20.77 | -11.07 | -8.42   |
| -CH <sub>3</sub>  | 29.77          | 2.73  | -10.00 | -21.43 | -14.66 | -13.59  |
| -H                | 25.44          | 2.74  | -9.98  | -20.37 | -15.60 | -17.76  |
| -Br               | 8.37           | 2.77  | -10.11 | -22.30 | -23.77 | -45.03  |
| -CF <sub>3</sub>  | -2.01          | 2.75  | -10.17 | -21.38 | -31.86 | -62.67  |
| -NO <sub>2</sub>  | -18.18         | 2.86  | -10.30 | -22.56 | -74.96 | -123.14 |

Table S10: Mulliken charge population ( $e^-$ ) on the  $\text{CO}_2$  moiety in the fully relaxed reactant and product states of the terphenyl $\cdots\text{CO}_2$  complex with different substituent groups. The calculations are performed at the B3LYP-D3(BJ)/6-311G(d,p) and  $\omega\text{B97X-V/def2-TZVPD}$  levels of theory, without and with the SMD solvation model. The results show that gas-phase B3LYP-D3(BJ)/6-311G(d,p) calculations suffer from spurious charge transfer from  $\text{CO}_2^{\bullet-}$  to the terphenyl moiety.

| group             | B3LYP-D3(BJ)<br>(vacuum) |         | $\omega\text{B97X-V}$<br>(vacuum) |         |
|-------------------|--------------------------|---------|-----------------------------------|---------|
|                   | reactant                 | product | reactant                          | product |
| –NMe <sub>2</sub> | -0.004                   | -0.753  | 0.010                             | -0.994  |
| –OH               | -0.004                   | -0.737  | 0.005                             | -0.989  |
| –H                | -0.004                   | -0.699  | 0.002                             | -0.989  |
| –CH <sub>3</sub>  | -0.010                   | -0.706  | 0.008                             | -0.989  |
| –Br               | -0.001                   | -0.645  | 0.012                             | -0.985  |
| –CF <sub>3</sub>  | 0.000                    | -0.599  | 0.013                             | -0.986  |
| –NO <sub>2</sub>  | 0.004                    | -0.423  | 0.012                             | -0.981  |

  

| group             | B3LYP-D3(BJ)<br>(CH <sub>2</sub> Cl <sub>2</sub> ) |         | $\omega\text{B97X-V}$<br>(CH <sub>2</sub> Cl <sub>2</sub> ) |         |
|-------------------|----------------------------------------------------|---------|-------------------------------------------------------------|---------|
|                   | reactant                                           | product | reactant                                                    | product |
| –NMe <sub>2</sub> | 0.002                                              | -0.977  | 0.014                                                       | -0.999  |
| –OH               | 0.001                                              | -0.974  | 0.009                                                       | -0.996  |
| –H                | 0.001                                              | -0.973  | 0.006                                                       | -0.995  |
| –CH <sub>3</sub>  | -0.004                                             | -0.974  | 0.013                                                       | -0.995  |
| –Br               | 0.003                                              | -0.972  | 0.013                                                       | -0.994  |
| –CF <sub>3</sub>  | 0.003                                              | -0.972  | 0.015                                                       | -0.995  |
| –NO <sub>2</sub>  | 0.007                                              | -0.716  | 0.020                                                       | -0.993  |

Table S11: Differential interaction energies (in kJ/mol) between the reactant and product complexes ( $\Delta\Delta E_{\text{INT}}$ ) and the differences between the monomer energies in the reactant and product complexes ( $\Delta E_{\text{PREP}}$ , including contributions from both geometric distortion and change in electronic configuration). Ignoring the entropic contributions the free energy driving force for the electron transfer (ET) reaction can be approximated by  $\Delta E_{\text{ET}} = \Delta\Delta E_{\text{INT}} + \Delta E_{\text{PREP}}$ .

|                   | $\Delta\Delta E_{\text{INT}}$ | $\Delta E_{\text{PREP}}$ | $\Delta E_{\text{ET}}$ |
|-------------------|-------------------------------|--------------------------|------------------------|
| –NMe <sub>2</sub> | 16.98                         | -50.45                   | -33.47                 |
| –OH               | 13.15                         | -32.45                   | -19.30                 |
| –CH <sub>3</sub>  | 12.69                         | -20.82                   | -8.13                  |
| –H                | 12.26                         | -11.12                   | 1.14                   |
| –Br               | 7.44                          | 5.54                     | 12.98                  |
| –CF <sub>3</sub>  | 5.89                          | 25.72                    | 31.61                  |
| –NO <sub>2</sub>  | 1.41                          | 74.33                    | 75.74                  |

## S4 Sample input for calculations using PCM

```
$molecule
  0 1
  --
  1 1
  Na 0.0  0.0  0.0
  --
  -1 1
  Cl 0.0  0.0  scan

  scan = 20.0
$end

$rem
  jobtype  eda
  eda2     2
  method   wb97x-v
  basis     def2-tzvppd
  scf_convergence 8
  thresh   14
  symmetry false
  sym_ignore true
  solvent_method pcm
$end

$pcm
  theory          cpcm
  method          swig
  solver          inversion
  radii           uff
  hpoints         302
  heavypoints     302
  vdWScale        1.2
$end

$solvent
  dielectric      80.0
$end
```

## References

- 1 A. J. Cohen, P. Mori-Sánchez and W. Yang, *Science*, 2008, **321**, 792–794.
- 2 D. Hait and M. Head-Gordon, *J. Phys. Chem. Lett.*, 2018, **9**, 6280–6288.
- 3 Y. Mao, D. S. Levine, M. Loipersberger, P. R. Horn and M. Head-Gordon, *Phys. Chem. Chem. Phys.*, 2020, **22**, 12867–12885.
